# Supplementary material for: Polyaniline-Coated Porous Vanadium Nitride Microrods for Enhanced Performance of a Lithium–Sulfur Battery
Source: MDPI journal article supplement (doi:10.3390/molecules28041823), 2023-02-15
Supplement: s1 [file s1]

## Supporting information

# Polyaniline-Coated Porous Vanadium Nitride Microrods for Enhanced Performance of a Lithium–Sulfur Battery

Jingjie Lv <sup>1</sup>, Haibo Ren <sup>2,\*</sup>, Ziyang Cheng <sup>1</sup>, Sang Woo Joo <sup>3,\*</sup> and Jiarui Huang <sup>1,\*</sup>

<sup>1</sup> Key Laboratory of Functional Molecular Solids of the Ministry of Education, Anhui Laboratory of Molecule-Based Materials, College of Chemistry and Materials Science, Anhui Normal University, Wuhu 241002, China

<sup>2</sup> School of Materials Science and Engineering, Modern Technology Center, Anhui Polytechnic University, Wuhu 241000, China

<sup>3</sup> School of Mechanical Engineering, Yeungnam University, Gyeongsan 712749, Republic of Korea

\* Correspondence: renhaibo@ahpu.edu.cn (H.R.); swjoo@yu.ac.kr (S.W.J.); jrhuang@ahnu.edu.cn (J.H.)

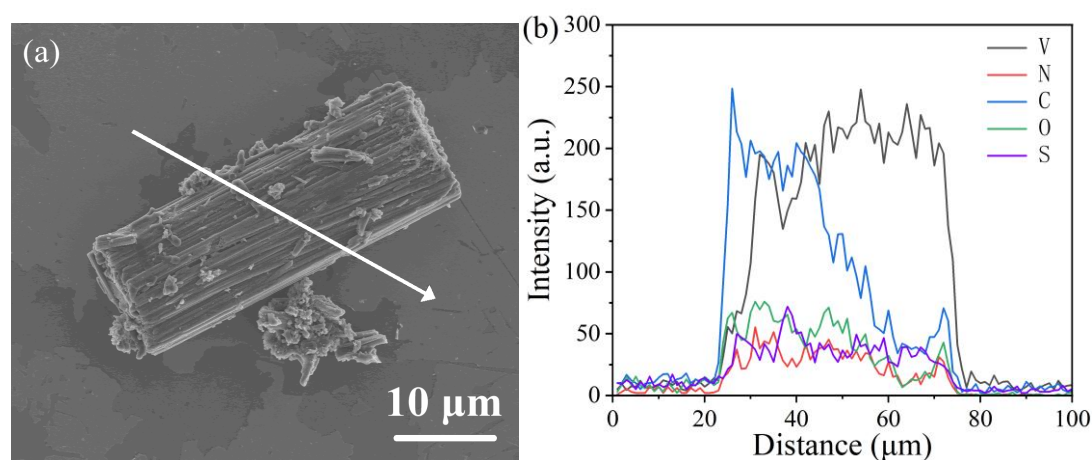

**Figure S1.** (a) SEM image of VN/S@PANI composite. (b) Line scanning curves of VN/S@PANI composite.

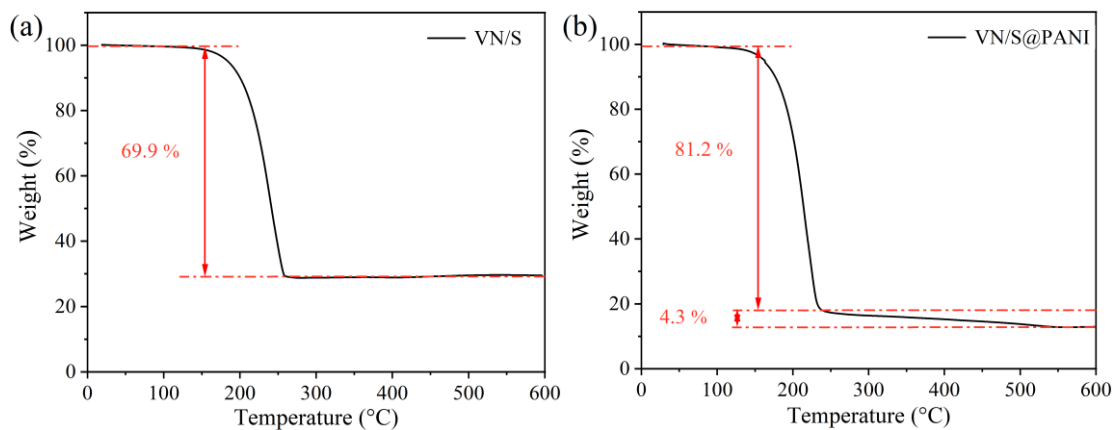

**Figure S2.** TGA curves of (a) VN/S microrods and (b) VN/S@PANI composite.

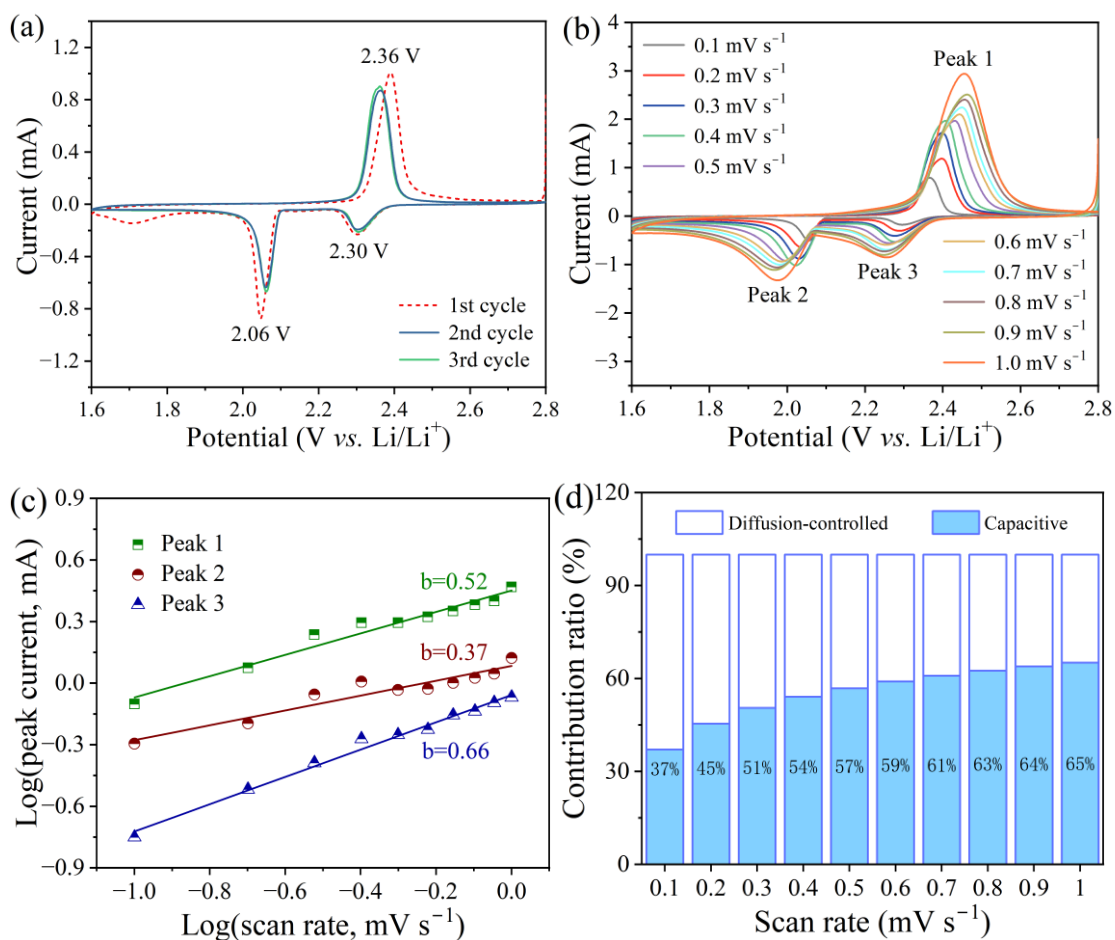

**Figure S3.** (a) Initial five CV curves of VN/S microrod cathode at a scan rate of  $0.1 \text{ mV s}^{-1}$ . (b) CV curves of VN/S microrod cathode at  $0.1$  to  $1.0 \text{ mV s}^{-1}$ . (c) The  $\log(i)$  vs.  $\log(v)$  of VN/S microrod cathode. (d) Contribution ratio of capacitance control and diffusion control.

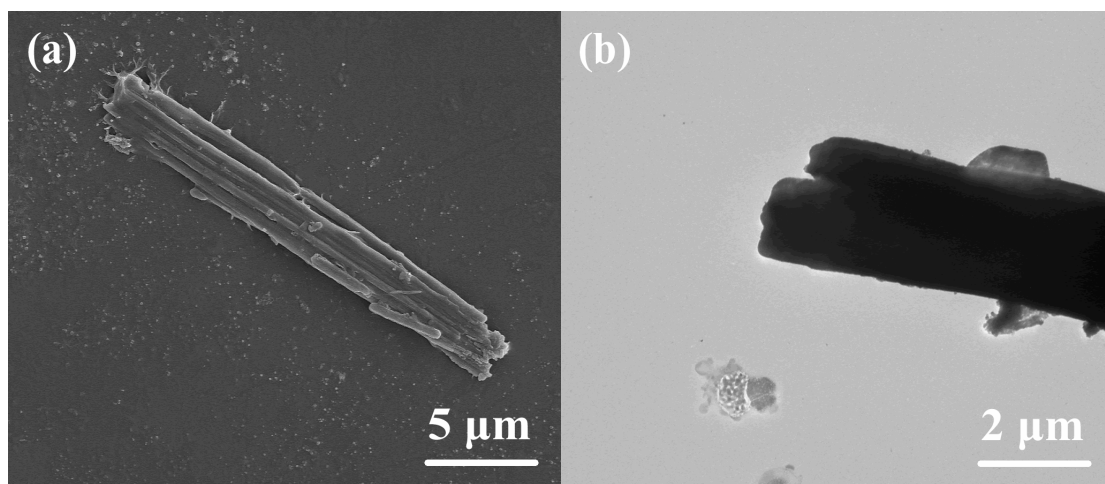

**Figure S4.** (a) SEM and (b) TEM images of VN/S@PANI microrod cathode after 500 cycles.

**Table 1** Compared electrochemical performance of reported materials as sulfur hosts or interlayers.

| Materials                       | Preparation method                  | Cycling rate ( $\text{A g}^{-1}$ ) /Cycle number | Capacity ( $\text{mAh g}^{-1}$ ) | Ref.      |
|---------------------------------|-------------------------------------|--------------------------------------------------|----------------------------------|-----------|
| VN/S microflowers               | Solution-calcining method           | 5/500                                            | 62                               | [11]      |
| PANI@BDC/S                      | Solution-calcining method           | 0.8/500                                          | 366                              | [35]      |
| S/VN@CNFs                       | Electrospinning and spraying method | 0.33/100                                         | 855                              | [38]      |
| VN-NCNFs/S nanofibers           | Electrospinning and spraying method | 1.67/500                                         | 560                              | [39]      |
| $\text{V}_2\text{O}_3$ -VN@NC/S | Solution-calcining method           | 0.33/150                                         | 716                              | [40]      |
| 3DNPC/VN-S nanoparticles        | Template method                     | 1.67/300                                         | 615                              | [41]      |
| CFP@PANI-PP                     | Hydrolysis method                   | 1.67/200                                         | 583                              | [42]      |
| $\text{V}_2\text{O}_3$ /S       | Hydrothermal method                 | 0.33/200                                         | 509                              | [43]      |
| AC@ $\text{V}_2\text{O}_5$ /S   | Solution-calcining method           | 0.17/100                                         | 795                              | [44]      |
| VN/S@PANI                       | Calcining method and coating        | 0.5/150<br>2.0/400                               | 735<br>458                       | This work |
